# Supplementary material for: The role of CDK8 in mesenchymal stem cells in controlling osteoclastogenesis and bone homeostasis
Source: PubMed Central journal article supplement (PMC9287674; doi:10.1016/j.stemcr.2022.06.001), 2022-06-30
Supplement: mmc1.pdf [file mmc1.pdf]

**Supplemental Information**

**The role of CDK8 in mesenchymal stem cells in controlling osteoclasto-  
genesis and bone homeostasis**

**Takanori Yamada, Kazuya Fukasawa, Tetsuhiro Horie, Takuya Kadota, Jiajun Lyu, Kazuya Tokumura, Shinsuke Ochiai, Sayuki Iwahashi, Akane Suzuki, Gyujin Park, Rie Ueda, Megumi Yamamoto, Tatsuya Kitao, Hiroaki Shirahase, Hiroki Ochi, Shingo Sato, Takashi Iezaki, and Eiichi Hinoi**

1 **Supplementary Table 1. List of primers used for genotyping**

| Gene        | Forward (5'-3')          | Reverse (5'-3')           |
|-------------|--------------------------|---------------------------|
| <i>Cre</i>  | GAACCTGATGGACATGTTCAGG   | AGTGCGTTCGAACGCTAGAGCCTGT |
| <i>CDK8</i> | CGTAGGTAGCAATCTGGTCGGGGT | CAGGTACACAGGCTGGATTTGCAC  |

2

3 **Supplementary Table 2. List of primers used for deletion PCR.**

| Gene        | Forward (5'-3')      | Reverse (5'-3')      |
|-------------|----------------------|----------------------|
| <i>CDK8</i> | CTTCCCTCTTCCCAGAGGAC | CAACCCCTTTTGAGGTTGAA |

4

5 **Supplementary Table 3. List of primers used for real-time PCR.**

| Gene             | Forward (5'-3')         | Reverse (5'-3')          |
|------------------|-------------------------|--------------------------|
| <i>Acp5</i>      | AGCTTCTCTGCCCTGGTACTC   | TGGCTGTGGGATCAGTTGGTG    |
| <i>Cdkn1a</i>    | TCGCTGTCTTGCACTCTGGTGT  | CCAATCTGCGCTTGGAGTGATAG  |
| <i>Ctsk</i>      | CAACTCTACTCCCTTCTCTCTGC | GAGGACTCCAATGTCTACCAGC   |
| <i>Gapdh</i>     | AGGTCGGTGTGAACGGATTTG   | TGTAGACCATGTAGTTGAGGTCA  |
| <i>Icam1</i>     | TTCACACTGAATGCCAGCTC    | GTCTGCTGAGACCCCTCTTG     |
| <i>Ifi204</i>    | GGAAAGAGACAACCAAGAGC    | TGGCTTGTAGTTGATGTAGG     |
| <i>Irf1</i>      | TCCAAGTCCAGCCGAGACACTA  | ACTGCTGTGGTCATCAGGTAGG   |
| <i>Irf8</i>      | TCCAAGTCCAGCCGAGACAC    | ACTGCTGTGGTCATCAGGTA     |
| <i>Mmp9</i>      | TGTGCGTTATGGTTCAGGTCAG  | CTGCCAGGAAGACACTTGGTTATC |
| <i>Smad7</i>     | AAGATCGGCTGTGGCATC      | CCAACAGCGTCCTGGAGT       |
| <i>Spi1</i>      | ATCCAGAAGGGCAACCGCAAG   | TCTTGACTTTCTTCACCTCGCCTG |
| <i>Tap1</i>      | GACTCCTTGCTCTCCACTCA    | AACGCTGTCACCGTTCAGG      |
| <i>Tnfrsf11b</i> | CTGCAATACACACACTCATCACT | ACCCAGAAACTGGTCATCAGC    |
| <i>Tnfsf11</i>   | TGTACTTTCGAGCGCAGATG    | CCACAATGTGTTGCAGTTCC     |

6

7

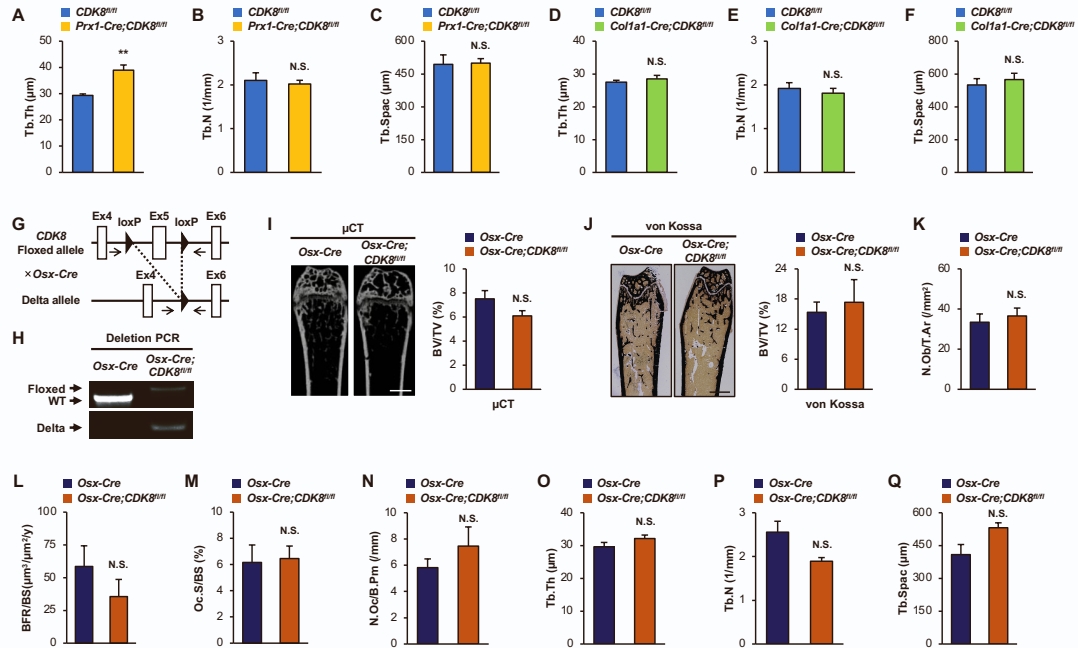

**Supplementary Figure 1. Skeletal phenotype analysis of conditional MSC-specific, osteoblast-specific, and osteoprogenitor-specific *CDK8* knockout mice.**

(A-C) Tb.Th (A), Tb.N (B) and Tb.Spac (C) measured by  $\mu$ CT of femurs from *CDK8<sup>fl/fl</sup>* and *Prx1-Cre;CDK8<sup>fl/fl</sup>* mice ( $n = 6-7$ , \*\* $P < 0.01$ ). (D-F) Tb.Th (D), Tb.N (E) and Tb.Spac (F) measured by  $\mu$ CT of femurs from *CDK8<sup>fl/fl</sup>* and *Coll1a1-Cre;CDK8<sup>fl/fl</sup>* mice ( $n = 6-7$ ). (G) Schematic diagram of generation of tissue-specific *CDK8* knockout mice. Black arrows represent primer binding sites. (H) Deletion efficiency of *CDK8* in the marrow-flushed bone of *Osx-Cre;CDK8<sup>fl/fl</sup>* mice at the genomic DNA level. (I)  $\mu$ CT analysis and BV/TV measurement of femurs from *Osx-Cre* and *Osx-Cre;CDK8<sup>fl/fl</sup>* mice ( $n = 4-5$ ). (J to N) BV/TV determined by von Kossa staining (J), N.Ob/T.Ar (K), BFR/BS (L), Oc.S/BS (M) and N.Oc/B.Pm (N) of femur from *Osx-Cre* and *Osx-Cre;CDK8<sup>fl/fl</sup>* mice ( $n = 4-5$ ). (O-Q) Tb.Th (O), Tb.N (P) and Tb.Spac (Q) measured by  $\mu$ CT of femurs from *CDK8<sup>fl/fl</sup>* and *Osx-Cre;CDK8<sup>fl/fl</sup>* mice ( $n = 4-5$ ). All mice used in this study were female. Scale bars, 1 mm (I and J).  $\mu$ CT, micro-computed tomography; Tb.Th, Trabecular thickness; Tb.N, Trabecular number; Tb.Spac; Trabecular spacing; BV/TV, bone volume/tissue volume; N.Ob/T.Ar, number of osteoblasts/tissue area; BFR/BS, bone formation rate/bone surface; Oc.S/BS, osteoclast surface/bone surface; N.Oc/B.Pm, number of osteoclasts/bone perimeter; N.S., not significant.

8  
9  
10  
11  
12  
13  
14  
15  
16  
17  
18  
19  
20  
21  
22  
23  
24  
25  
26  
27

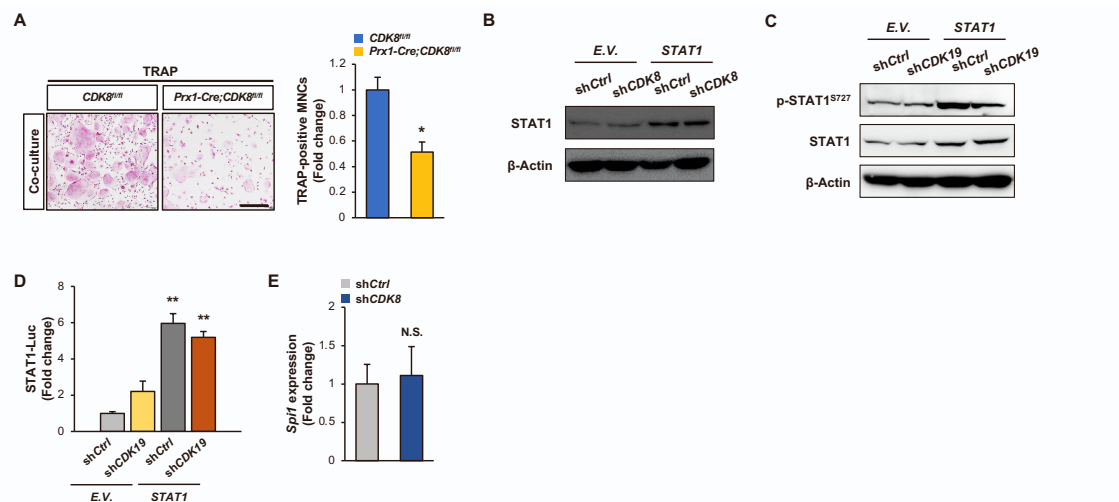

28

29 **Supplementary Figure 2. Co-culture of MSCs from *Prx1-Cre;CDK8<sup>fl/fl</sup>* mice and WT-**  
 30 **BMMs, and expression profiles of *CDK8* and *CDK19* knockdown MSCs.**

31 (A) BMMs prepared from WT mice were co-cultured with MSCs from *Prx1-*  
 32 *Cre;CDK8<sup>fl/fl</sup>* mice, followed by TRAP staining ( $n = 3$  independent replicates,  $*P < 0.05$ ).  
 33 (B) Protein levels of STAT1 in MSCs infected with sh*CDK8* in combination with *STAT1*  
 34 expression vector.  $\beta$ -Actin served as a loading control. (C) Protein levels of STAT1 and  
 35 p-STAT1<sup>Ser727</sup> in MSCs infected with sh*CDK19* in combination with *STAT1* expression  
 36 vector.  $\beta$ -Actin served as a loading control. (D) GAS-luc activity in MSCs infected with  
 37 sh*CDK19* in combination with *STAT1* expression vector ( $n = 3$  independent replicates,  
 38  $**P < 0.01$ ). (E) mRNA levels of *Spi1* in MSCs infected with sh*CDK8* ( $n = 4$  independent  
 39 replicate). Scale bar, 800  $\mu$ m (A). BMM, bone marrow macrophage; MSC, mesenchymal  
 40 stem cell; TRAP, tartrate-resistant acid phosphatase; sh*Ctrl*, sh*Control*; E.V., empty  
 41 vector; N.S., not significant.

42

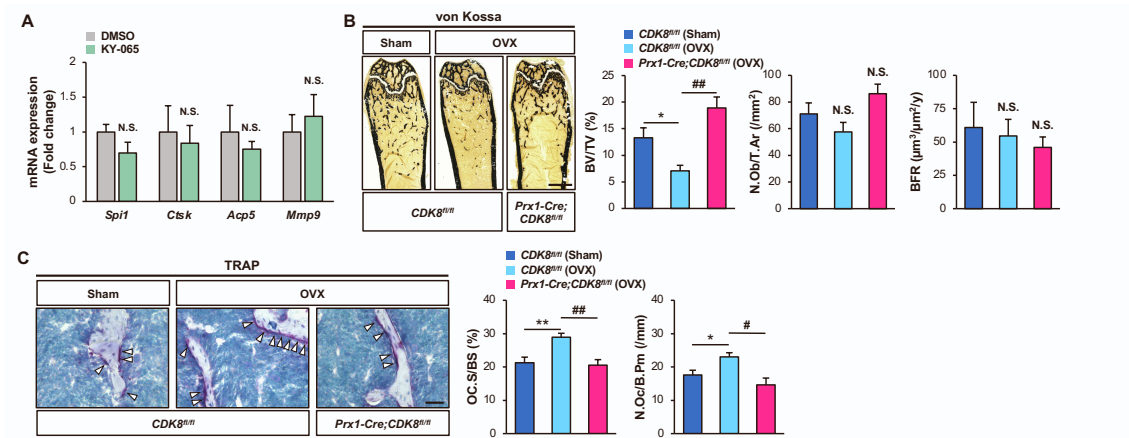

43

44 **Supplementary Figure 3. Expression levels of osteoclastic marker genes in BMMs**  
 45 **treated by KY-065, and the protective effect of MSC-specific CDK8 deficiency on**  
 46 **ovariectomy-induced bone loss.**

47 (A) mRNA levels of *Spi1*, *Ctsk*, *Acp5* and *Mmp9* in MSCs treated with 30 nM KY-065 (*n*  
 48 = 3 independent replicates). (B) BV/TV measured by von Kossa staining, N.Ob/T. Ar  
 49 determined by toluidine blue staining and BFR/BS determined by calcein labeling of  
 50 femurs from CDK8<sup>fl/fl</sup> and Prx1-Cre;CDK8<sup>fl/fl</sup> mice (*n* = 5-8, \**P* < 0.05 (CDK8<sup>fl/fl</sup> (sham)  
 51 vs CDK8<sup>fl/fl</sup> (OVX)), ###*P* < 0.01 (CDK8<sup>fl/fl</sup> (OVX) vs Prx1-Cre;CDK8<sup>fl/fl</sup>(OVX))). (C)  
 52 Oc.S/BS and N.Oc/B.Pm determined by TRAP staining of femur (*n* = 5-8, \**P* < 0.05  
 53 (CDK8<sup>fl/fl</sup> (sham) vs CDK8<sup>fl/fl</sup> (OVX)), \*\**P* < 0.01 (CDK8<sup>fl/fl</sup> (sham) vs CDK8<sup>fl/fl</sup> (OVX)),  
 54 #*P* < 0.05 (CDK8<sup>fl/fl</sup> (OVX) vs Prx1-Cre;CDK8<sup>fl/fl</sup>(OVX)), ###*P* < 0.01 (CDK8<sup>fl/fl</sup> (OVX)  
 55 vs Prx1-Cre;CDK8<sup>fl/fl</sup>(OVX))). Scale bars, 1 mm (B), 50 μm (C). OVX, ovariectomy;  
 56 BV/TV, bone volume/tissue volume; N.Ob/T.Ar, number of osteoblasts/tissue area;  
 57 BFR/BS, bone formation rate/bone surface; TRAP, tartrate-resistant acid phosphatase;  
 58 Oc.S/BS, osteoclast surface/bone surface; N.Oc/B.Pm, number of osteoclasts/bone  
 59 perimeter; N.S., not significant.

60
